# Supplementary material
Source: PubMed Central journal article supplement (PMC6314263)
Supplement: 10.1194_P088997_jlr.P088997-1.pdf [file 10.1194_P088997_jlr.P088997-1.pdf]

**Supplemental Table S1.** Clinical and laboratory characteristics including serum paraoxonase-1 activity sex divided in 5,539 subjects with a Fatty Liver Index (FLI) < 60 and 2,083 subjects with an FLI ≥ 60.

|                                              | <b>FLI &lt; 60</b><br>n = 5,539 | <b>FLI ≥ 60</b><br>n = 2,083 | <b>P</b> |
|----------------------------------------------|---------------------------------|------------------------------|----------|
| <b>Age (years)</b>                           |                                 |                              |          |
| • Men                                        | 48.7 ± 13.3                     | 54.3 ± 11.4                  | <0.001   |
| • Women                                      | 47.1 ± 11.9                     | 56.0 ± 11.6                  | <0.001   |
| <b>T2D (n)</b>                               |                                 |                              |          |
| • Men                                        | 47                              | 110                          | <0.001   |
| • Women                                      | 45                              | 67                           | <0.001   |
| <b>MetS (n)</b>                              |                                 |                              |          |
| • Men                                        | 184                             | 832                          | <0.001   |
| • Women                                      | 292                             | 478                          | <0.001   |
| <b>History of cardiovascular disease (n)</b> |                                 |                              |          |
| • Men                                        | 144                             | 153                          | <0.001   |
| • Women                                      | 63                              | 34                           | <0.001   |
| <b>Current smokers (n)</b>                   |                                 |                              |          |
| • Men                                        | 823                             | 487                          | <0.001   |
| • Women                                      | 1,050                           | 208                          | 0.914    |
| <b>Alcohol (≥10 g/day)</b>                   |                                 |                              |          |
| • Men                                        | 743                             | 525                          | <0.001   |
| • Women                                      | 558                             | 91                           | 0.016    |
| <b>Antihypertensive medication (n)</b>       |                                 |                              |          |
| • Men                                        | 263                             | 362                          | <0.001   |

|                                         |             |             |        |
|-----------------------------------------|-------------|-------------|--------|
| • Women                                 | 313         | 238         | <0.001 |
| <b>Glucose lowering drugs (n)</b>       |             |             |        |
| • Men                                   | 28          | 47          | <0.001 |
| • Women                                 | 31          | 27          | <0.001 |
| <b>Lipid lowering drugs (n)</b>         |             |             |        |
| • Men                                   | 126         | 157         | <0.001 |
| • Women                                 | 121         | 79          | <0.001 |
| <b>Systolic blood pressure (mm Hg)</b>  |             |             |        |
| • Men                                   | 129 ± 17    | 141 ± 19    | <0.001 |
| • Women                                 | 121 ± 19    | 139 ± 21    | <0.001 |
| <b>Diastolic blood pressure (mm Hg)</b> |             |             |        |
| • Men                                   | 74 ± 9      | 81 ± 9      | <0.001 |
| • Women                                 | 70 ± 9      | 76 ± 9      | <0.001 |
| <b>BMI (kg/m<sup>2</sup>)</b>           |             |             |        |
| • Men                                   | 24.4 ± 2.4  | 29.4 ± 3.2  | <0.001 |
| • Women                                 | 24.4 ± 3.2  | 32.9 ± 4.6  | <0.001 |
| <b>Waist circumference (cm)</b>         |             |             |        |
| • Men                                   | 88 ± 8      | 103 ± 9     | <0.001 |
| • Women                                 | 79 ± 9      | 102 ± 10    | <0.001 |
| <b>Waist/hip ratio</b>                  |             |             |        |
| • Men                                   | 0.91 ± 0.06 | 0.99 ± 0.06 | <0.001 |
| • Women                                 | 0.81 ± 0.07 | 0.90 ± 0.07 | <0.001 |
| <b>Glucose (mmol/L)</b>                 |             |             |        |
| • Men                                   | 4.76 ± 0.90 | 5.39 ± 1.57 | <0.001 |
| • Women                                 | 4.55 ± 0.75 | 5.46 ± 1.73 | <0.001 |

|                                         |                  |                  |        |
|-----------------------------------------|------------------|------------------|--------|
| <b>hsCRP (mg/L)</b>                     |                  |                  |        |
| • Men                                   | 0.88 (0.40-2.00) | 1.93 (1.00-3.80) | <0.001 |
| • Women                                 | 1.04 (0.48-2.53) | 3.83 (1.96-6.97) | <0.001 |
| <b>ALT (U/L)</b>                        |                  |                  |        |
| • Men                                   | 22 (17-28)       | 31 (23-42)       | <0.001 |
| • Women                                 | 16 (13-20)       | 21 (17-30)       | <0.001 |
| <b>AST (U/L)</b>                        |                  |                  |        |
| • Men                                   | 25 (20-29)       | 28 (24-34)       | <0.001 |
| • Women                                 | 22 (19-25)       | 24 (21-28)       | <0.001 |
| <b>GGT (U/L)</b>                        |                  |                  |        |
| • Men                                   | 24 (18-34)       | 47 (34-73)       | <0.001 |
| • Women                                 | 16 (13-23)       | 32 (23-47)       | <0.001 |
| <b>eGFR (ml/min/1.73 m<sup>2</sup>)</b> |                  |                  |        |
| • Men                                   | 96.7 ± 17.1      | 90.1 ± 17.5      | <0.001 |
| • Women                                 | 97.5 ± 16.0      | 86.8 ± 18.2      | <0.001 |
| <b>UAE (mg/24 hr)</b>                   |                  |                  |        |
| • Men                                   | 9.0 (6.5-16.4)   | 15.2 (8.6-36.4)  | <0.001 |
| • Women                                 | 8.0 (5.7-12.7)   | 11.3 (6.9-23.1)  | <0.001 |
| <b>Total cholesterol (mmol/L)</b>       |                  |                  |        |
| • Men                                   | 5.41 ± 1.01      | 6.07 ± 1.12      | <0.001 |
| • Women                                 | 5.49 ± 1.14      | 6.17 ± 1.07      | <0.001 |
| <b>Non-HDL cholesterol (mmol/L)</b>     |                  |                  |        |
| • Men                                   | 4.18 ± 1.03      | 5.04 ± 1.13      | <0.001 |
| • Women                                 | 3.94 ± 1.19      | 4.95 ± 1.12      | <0.001 |
| <b>LDL cholesterol (mmol/L)</b>         |                  |                  |        |

|                                 |                  |                  |        |
|---------------------------------|------------------|------------------|--------|
| • Men                           | 3.65 ± 0.94      | 4.00 ± 1.08      | <0.001 |
| • Women                         | 3.45 ± 1.08      | 4.01 ± 1.02      | <0.001 |
| <b>HDL cholesterol</b> (mmol/L) |                  |                  |        |
| • Men                           | 1.24 ± 0.31      | 1.03 ± 0.28      | <0.001 |
| • Women                         | 1.55 ± 0.40      | 1.22 ± 0.31      | <0.001 |
| <b>Triglycerides</b> (mmol/L)   |                  |                  |        |
| • Men                           | 1.05 (0.80-1.38) | 1.96 (1.44-2.74) | <0.001 |
| • Women                         | 0.96 (0.74-1.28) | 1.75 (1.30-2.44) | <0.001 |
| <b>PON-1 activity</b> (U/L)     |                  |                  |        |
| • Men                           | 51.6 (42.0-62.7) | 53.5 (43.5-64.0) | 0.016  |
| • Women                         | 54.3 (44.0-67.2) | 53.1 (46.8-65.8) | 0.531  |

Data are means ± SD, medians (interquartile ranges) or numbers (percentages). Abbreviations: ALT, aminotransferase; AST, aspartate aminotransferase; AU, arbitrary units; BMI, body mass index; GGT, gamma-glutamyltransferase; HDL, high density lipoproteins; hsCRP, high sensitivity C-reactive protein; LDL, low density lipoproteins; MetS, metabolic syndrome; PON-1, paraoxonase-1; T2D, type 2 diabetes mellitus. LDL cholesterol was calculated by the Friedewald formula in 5,509 subjects with an FLI < 60 and in 1,973 subjects with an FLI ≥ 60.
