# Supplementary material
Source: PubMed Central journal article supplement (PMC6314263)
Supplement: 10.1194_P088997_jlr.P088997-2.pdf [file 10.1194_P088997_jlr.P088997-2.pdf]

**Supplemental Table S2.** Clinical and laboratory characteristics including serum paraoxonase-1 activity sex divided in 5,117 subjects with a Hepatic Steatosis Index (HSI)  $\leq$  36 and 2,505 subjects with a HSI  $>$  36.

|                                              | <b>HSI <math>\leq</math> 36</b><br>n = 5,117 | <b>HSI <math>&gt;</math> 36</b><br>n = 2,505 | <b>P</b> |
|----------------------------------------------|----------------------------------------------|----------------------------------------------|----------|
| <b>Age (years)</b>                           |                                              |                                              |          |
| • Men                                        | 50.5 $\pm$ 13.5                              | 51.4 $\pm$ 11.7                              | 0.032    |
| • Women                                      | 46.5 $\pm$ 11.7                              | 53.3 $\pm$ 12.2                              | <0.001   |
| <b>T2D (n)</b>                               |                                              |                                              |          |
| • Men                                        | 45                                           | 112                                          | <0.001   |
| • Women                                      | 25                                           | 87                                           | <0.001   |
| <b>MetS (n)</b>                              |                                              |                                              |          |
| • Men                                        | 339                                          | 677                                          | <0.001   |
| • Women                                      | 192                                          | 578                                          | <0.001   |
| <b>History of cardiovascular disease (n)</b> |                                              |                                              |          |
| • Men                                        | 193                                          | 104                                          | 0.753    |
| • Women                                      | 52                                           | 45                                           | 0.001    |
| <b>Current smokers (n)</b>                   |                                              |                                              |          |
| • Men                                        | 912                                          | 398                                          | 0.345    |
| • Women                                      | 935                                          | 323                                          | <0.001   |
| <b>Alcohol (<math>\geq</math>10 g/day)</b>   |                                              |                                              |          |
| • Men                                        | 828                                          | 440                                          | 0.580    |
| • Women                                      | 490                                          | 159                                          | <0.001   |

|                                         |             |             |        |
|-----------------------------------------|-------------|-------------|--------|
| <b>Antihypertensive medication (n)</b>  |             |             |        |
| • Men                                   | 344         | 281         | <0.001 |
| • Women                                 | 228         | 323         | <0.001 |
| <b>Glucose lowering drugs (n)</b>       |             |             |        |
| • Men                                   | 24          | 51          | <0.001 |
| • Women                                 | 18          | 40          | <0.001 |
| <b>Lipid lowering drugs (n)</b>         |             |             |        |
| • Men                                   | 169         | 114         | 0.025  |
| • Women                                 | 99          | 101         | <0.001 |
| <b>Systolic blood pressure (mm Hg)</b>  |             |             |        |
| • Men                                   | 131 ± 18    | 139 ± 18    | <0.001 |
| • Women                                 | 120 ± 19    | 134 ± 21    | <0.001 |
| <b>Diastolic blood pressure (mm Hg)</b> |             |             |        |
| • Men                                   | 75 ± 9      | 80 ± 9      | <0.001 |
| • Women                                 | 70 ± 9      | 74 ± 9      | <0.001 |
| <b>BMI (kg/m<sup>2</sup>)</b>           |             |             |        |
| • Men                                   | 24.5 ± 2.5  | 29.6 ± 3.2  | <0.001 |
| • Women                                 | 23.5 ± 2.5  | 31.1 ± 4.2  | <0.001 |
| <b>Waist circumference (cm)</b>         |             |             |        |
| • Men                                   | 89 ± 9      | 102 ± 10    | <0.001 |
| • Women                                 | 77 ± 9      | 95 ± 11     | <0.001 |
| <b>Waist/hip ratio</b>                  |             |             |        |
| • Men                                   | 0.92 ± 0.07 | 0.98 ± 0.07 | <0.001 |

|                                         |                  |                  |        |
|-----------------------------------------|------------------|------------------|--------|
| • Women                                 | 0.80 ± 0.07      | 0.87 ± 0.07      | <0.001 |
| <b>hsCRP (mg/L)</b>                     |                  |                  |        |
| • Men                                   | 1.00 (0.44-2.36) | 1.69 (0.83-3.39) | <0.001 |
| • Women                                 | 0.95 (0.43-2.33) | 2.63 (1.25-5.20) | <0.001 |
| <b>ALT (U/L)</b>                        |                  |                  |        |
| • Men                                   | 21 (17-27)       | 35 (26-46)       | <0.001 |
| • Women                                 | 15 (12-19)       | 21 (16-29)       | <0.001 |
| <b>AST (U/L)</b>                        |                  |                  |        |
| • Men                                   | 25 (22-30)       | 28 (24-33)       | <0.001 |
| • Women                                 | 22 (19-25)       | 23 (20-27)       | <0.001 |
| <b>GGT (U/L)</b>                        |                  |                  |        |
| • Men                                   | 26 (19-37)       | 42 (31-65)       | <0.001 |
| • Women                                 | 16 (12-23)       | 25 (17-37)       | <0.001 |
| <b>eGFR (ml/min/1.73 m<sup>2</sup>)</b> |                  |                  |        |
| • Men                                   | 94.7 ± 18.0      | 93.4 ± 16.8      | 0.039  |
| • Women                                 | 97.8 ± 15.9      | 90.9 ± 18.0      | <0.001 |
| <b>UAE (mg/24 hr)</b>                   |                  |                  |        |
| • Men                                   | 9.5 (6.6-18.8)   | 13.6 (8.0-30.8)  | <0.001 |
| • Women                                 | 8.0 (5.7-12.9)   | 9.4 (6.2-18.1)   | <0.001 |
| <b>Total cholesterol (mmol/L)</b>       |                  |                  |        |
| • Men                                   | 5.54 ± 1.09      | 5.90 ± 1.08      | <0.001 |
| • Women                                 | 5.44 ± 1.13      | 5.96 ± 1.13      | <0.001 |
| <b>Non-HDL cholesterol (mmol/L)</b>     |                  |                  |        |

|                                 |                  |                  |        |
|---------------------------------|------------------|------------------|--------|
| • Men                           | 4.31 ± 1.13      | 4.86 ± 1.10      | <0.001 |
| • Women                         | 3.88 ± 1.18      | 4.63 ± 1.19      | <0.001 |
| <b>LDL cholesterol</b> (mmol/L) |                  |                  |        |
| • Men                           | 3.69 ± 0.98      | 3.94 ± 1.05      | <0.001 |
| • Women                         | 3.38 ± 1.07      | 3.91 ± 1.06      | <0.001 |
| <b>HDL cholesterol</b> (mmol/L) |                  |                  |        |
| • Men                           | 1.23 ± 0.32      | 1.03 ± 0.27      | <0.001 |
| • Women                         | 1.57 ± 0.41      | 1.33 ± 0.35      | <0.001 |
| <b>Triglycerides</b> (mmol/L)   |                  |                  |        |
| • Men                           | 1.13 (0.84-1.59) | 1.69 (1.18-2.44) | <0.001 |
| • Women                         | 0.96 (0.72-1.29) | 1.31 (0.96-1.89) | <0.001 |
| <b>PON-1 activity</b> (U/L)     |                  |                  |        |
| • Men                           | 51.7 (42.3-63.2) | 53.3 (42.9-63.6) | 0.149  |
| • Women                         | 54.2 (44.0-67.4) | 54.0 (43.8-66.3) | 0.687  |

Data are means ± SD, medians (interquartile ranges) or numbers (percentages). Abbreviations: ALT,

aminotransferase; AST, aspartate aminotransferase; AU, arbitrary units; BMI, body mass index; GGT, gamma-

glutamyltransferase; HDL, high density lipoproteins; hsCRP, high sensitivity C-reactive protein; LDL, low density

lipoproteins; MetS, metabolic syndrome; PON-1, paraoxonase-1; T2D, type 2 diabetes mellitus. LDL cholesterol

was calculated by the Friedewald formula in 565 subjects with an HSI ≤ 36 and in 2,417 subjects with an HSI >
