# Supplementary material
Source: PubMed Central journal article supplement (PMC6314263)
Supplement: 10.1194_P088997_jlr.P088997-3.pdf [file 10.1194_P088997_jlr.P088997-3.pdf]

**Supplemental Table S3.** Clinical and laboratory characteristics including serum paraoxonase-1 activity in 1,636 subjects with a Fatty Liver Index (FLI)  $\geq 60$  and Hepatic Steatosis Index HSI  $> 36$  compared to subjects with a FLI  $<60$  and a HSI  $\leq 36$ .

|                                              | <b>FLI <math>&lt;60</math> and<br/>HSI <math>\leq 36</math></b><br>n = 5,986 | <b>FLI <math>\geq 60</math> and<br/>HSI <math>&gt; 36</math></b><br>n = 1,636 | <b><i>P</i></b> |
|----------------------------------------------|------------------------------------------------------------------------------|-------------------------------------------------------------------------------|-----------------|
| <b>Age</b> (years)                           | 48.5 $\pm$ 12.7                                                              | 54.0 $\pm$ 11.4                                                               | $<0.001$        |
| <b>Sex</b> (men/women) (n)                   | 2,781/3,205                                                                  | 1,016/620                                                                     | $<0.001$        |
| <b>T2D</b> (n)                               | 107                                                                          | 162                                                                           | $<0.001$        |
| <b>MetS</b> (n)                              | 693                                                                          | 1,093                                                                         | $<0.001$        |
| <b>History of cardiovascular disease</b> (n) | 270                                                                          | 124                                                                           | $<0.001$        |
| <b>Current smokers</b> (n)                   | 2,052                                                                        | 516                                                                           | 0.321           |
| <b>Alcohol</b> ( $\geq 10$ g/day)            | 1,496                                                                        | 421                                                                           | 0.488           |
| <b>Antihypertensive medication</b> (n)       | 701                                                                          | 475                                                                           | $<0.001$        |
| <b>Glucose lowering drugs</b> (n)            | 65                                                                           | 68                                                                            | $<0.001$        |
| <b>Lipid lowering drugs</b> (n)              | 312                                                                          | 171                                                                           | $<0.001$        |
| <b>Systolic blood pressure</b> (mm Hg)       | 126 $\pm$ 19                                                                 | 140 $\pm$ 19                                                                  | $<0.001$        |
| <b>Diastolic blood pressure</b> (mm Hg)      | 73 $\pm$ 9                                                                   | 79 $\pm$ 9                                                                    | $<0.001$        |
| <b>BMI</b> (kg/m <sup>2</sup> )              | 24.6 $\pm$ 2.9                                                               | 31.4 $\pm$ 3.9                                                                | $<0.001$        |

|                                         |                  |                  |        |
|-----------------------------------------|------------------|------------------|--------|
| <b>Waist circumference (cm)</b>         | 84 ± 10          | 104 ± 9          | <0.001 |
| <b>Waist/hip ratio</b>                  | 0.86 ± 0.09      | 0.96 ± 0.08      | <0.001 |
| <b>Glucose (mmol/L)</b>                 | 4.67 ± 0.84      | 5.51 ± 1.75      | <0.001 |
| <b>hsCRP (mg/L)</b>                     | 1.02 (0.46-2.46) | 2.47 (1.26-5.15) | <0.001 |
| <b>ALT (U/L)</b>                        | 18 (14-24)       | 29 (22-41)       | <0.001 |
| <b>AST (U/L)</b>                        | 23 (20-27)       | 27 (23-32)       | <0.001 |
| <b>GGT (U/L)</b>                        | 21 (15-30)       | 41 (29-64)       | <0.001 |
| <b>eGFR (ml/min/1.73 m<sup>2</sup>)</b> | 96.3 ± 17.0      | 90.1 ± 17.2      | <0.001 |
| <b>UAE (mg/24 hr)</b>                   | 8.7 (6.1-15.1)   | 13.6 (8.0-30.7)  | <0.001 |
| <b>Total cholesterol (mmol/L)</b>       | 5.51 ± 1.11      | 6.07 ± 1.09      | <0.001 |
| <b>Non-HDL cholesterol (mmol/L)</b>     | 4.12 ± 1.17      | 4.98 ± 1.11      | <0.001 |
| <b>LDL cholesterol (mmol/L)</b>         | 3.57 ± 1.04      | 4.00 ± 1.07      | <0.001 |
| <b>HDL cholesterol (mmol/L)</b>         | 1.39 ± 0.40      | 1.08 ± 0.29      | <0.001 |
| <b>Triglycerides (mmol/L)</b>           | 1.04 (0.78-1.42) | 1.85 (1.34-2.56) | <0.001 |
| <b>PON-1 activity (U/L)</b>             | 53.3 (43.3-65.2) | 53.2 (43.0-64.3) | 0.676  |

Data are means ± SD, medians (interquartile ranges) or numbers (percentages). Abbreviations: ALT, aminotransferase; AST, aspartate aminotransferase; AU, arbitrary units; BMI, body mass index; GGT, gamma-glutamyltransferase; HDL, high density lipoproteins; hsCRP, high sensitivity C-reactive protein; LDL, low density lipoproteins; MetS, metabolic syndrome; PON-1, paraoxonase-1; T2D, type 2 diabetes mellitus. LDL cholesterol was calculated by the Friedewald formula.
